# Supplementary material
Source: PubMed Central journal article supplement (PMC6393231)
Supplement: BPH-176-787-s001.pdf [file BPH-176-787-s001.pdf]

**Supplementary Table 1.**

Demographic and clinical characteristics of 19 HCC patients analysed.

| <b>Variable</b>                  |                |
|----------------------------------|----------------|
| Age, mean $\pm$ SEM              | 61.2 $\pm$ 2.2 |
| Age, range                       | 46-77          |
| Males, n (%)                     | 17 (89.5)      |
| <b>Underlying disease, n (%)</b> |                |
| Cirrhosis                        | 16 (84.2)      |
| Hepatitis C virus                | 4 (21.1)       |
| Alcoholic                        | 11 (57.9)      |
| Diabetes                         | 2 (10.5)       |
| <b>Tumor stage, n (%)</b>        |                |
| BCLCA                            | 15 (78.9)      |
| BCLCB                            | 3 (15.8)       |
| BCLCC                            | 1 (5.3)        |

BCLC, Barcelona Clinic Liver Cancer.

**Supplementary Table 2.** Sequence of oligonucleotide primers used for quantitative PCR.

| <b>Gene</b>              | <b>Accession number</b> | <b>Forward primer (5' – 3')</b> | <b>Reverse primer (5' – 3')</b> |
|--------------------------|-------------------------|---------------------------------|---------------------------------|
| <b>Human</b>             |                         |                                 |                                 |
| <i>hOCT1</i> total       | NM_003057               | TGCAGACAGGTTTGGCCGT             | GCCCGAGCCAACAAATTCTGTGAT        |
| <i>hOCT1</i> Full length | NM_003057               | GATTTTTATCTCACCTGACCTGCACTGGTT  | AGGCCCAACACCGCAAACA             |
| <i>hOCT1</i> Spliced     | NM_003057               | GGAAGCGCACCTTCATCCTGAT          | CAGGTGCCCGAGGGTTCT              |
| <i>hAUF1</i>             | NM_001003810            | GTAAGAACGAGGAGGATGAAGGGAAAATGT  | TTGATCCATGACCTTATCTACACTCTCCGA  |
| <i>hCUGBP</i>            | NM_006560               | CCTCAGAGCAAAGGGTGCTGTT          | TCCTGTCTTCCACTGCATTGTTCTTCT     |
| <i>hHUR</i>              | NM_001419               | CGGGATAAAGTAGCAGGACACAGCTT      | GGGCGAGCATACGACACCTT            |
| <i>hTTP</i>              | NM_003407               | CTGCCATCTACGAGAGCCTCCT          | GCGAAGTGGGTGAGGGTGA             |
| <i>hBRF1</i>             | NM_004926               | GCGTGTGGGACTCCAGACA             | TCTTGTTACCCTTGCATAAACTTCGCTCA   |
| <i>hBRF2</i>             | NM_006887               | CCCGTTATTCGTCGTGGCTCAA          | CCAGGGATTTCTCTGTCTTGCACA        |
| <i>hFBP2</i>             | NM_003685               | GTTGGAAGATGGAGATCAACCGGAGA      | GTCATTGAAGTCCTTGGGGGAGGAT       |
| <i>hGAPDH</i>            | NM_002046               | TGAGCCCGCAGCCTCC                | TACGACCAAATCCGTTGACTCC          |
| <i>hHPRT1</i>            | NM_000194               | GCCCTGGCGTCGTGATTAGT            | AGCAAGACGTTTCAGTCCTGTCCATAA     |
| <b>Mouse</b>             |                         |                                 |                                 |
| <i>mOct1</i>             | NM_009202               | TCGTCACTGAGTTTAACTGGTGTGT       | TTACGGCCAACCTGTCTGCAA           |
| <i>mGapdh</i>            | NM_008084               | ACACTGAGCAAGAGAGGCCCTA          | GGGTGCAGCGAACTTTATTGATGGTATT    |
| <b>Rat</b>               |                         |                                 |                                 |
| <i>rOct1</i>             | NM_012697               | CATTGCAGACAGGTTTGGCCGTAA        | GCAGGCGAAAGAGCAACATGGAT         |
| <i>rActb</i>             | NM_031144               | TCTGTGTGGATTGGTGGCTCTA          | CTGCTTGCTGATCCACATCTG           |

**Supplementary Table 3.** Sequence of forward (F) and reverse (R) oligonucleotide primers used for cloning.

| Gene                |    | Oligonucleotide sequence 5' – 3'                                                    |
|---------------------|----|-------------------------------------------------------------------------------------|
| <i>hOCT1</i>        | F  | CCAAGGTTCTTAATTAAGCCAAGATGCCACCGTGGAT                                               |
|                     | R  | GGAACCTTGTTAATTAAGGTGCCCGAGGGTTCTGA                                                 |
| <i>hOCT3</i>        | F  | AATTGGCCACGCGTACCATGCCCTCCTTCGACG                                                   |
|                     | R  | AACCTTGGACTAGTAAGGTGAGAGCGGGAACTGG                                                  |
| <i>sh-OCT1</i>      | F  | CGCGTAAGAACGGTGGCGATCATGTACCAGATGGTTCAAGAGACCATCTGGTACATGATCGCCACCGTTCTTTTTTTGGAAAT |
|                     | R  | CGATTTCCAAAAAAGAACGGTGGCGATCATGTACCAGATGGTCTCTTGAACCATCTGGTACATGATCGCCACCGTTCTTA    |
| <i>sh-Luc2</i>      | F  | CGCGTCTGACGCGGAATACTTCGATTCAAGAGATCGAAGTATTCCGCGTCAGTTTTTTGGAAATCG                  |
|                     | R  | CGATTTCCAAAACTGACGCGGAATACTTCGATCTCTTGAATCGAAGTATTCCGCGTCAGACGCG                    |
| <i>hsa-mir-330</i>  | F1 | CGCGTCTTTGGCGATCACTGCCTCTCTGGGCCTGTGTCTTAGGCTCTGCAAGA                               |
|                     | R1 | GGTTGATCTTGACAGAGCCTAAGACACAGGCCAGAGAGGCAGTGATCGCCAAAGA                             |
|                     | F2 | TCAACCGAGCAAAGCACACGGCCTGCAGAGAGGCAGCGCTCTGCCAT                                     |
|                     | R2 | CGATGGGCAGAGCGCTGCCTCTCTGCAGGCCGTGTGCTTTGCTC                                        |
| <i>hsa-mir-769</i>  | F1 | CGCGTGCCTTGGTGCTGATTCTGGGCTCTGACCTGAGACCTCTGGGTTCTGAGCTGTGATGTT                     |
|                     | R1 | GAGCAACATCACAGCTCAGAACCCAGAGGTCTCAGGTCAGAGCCCAGGAATCAGCACCAAGGCA                    |
|                     | F2 | GCTCTCGAGCTGGGATCTCCGGGGTCTTGGTTCAAGGCCGGGCCTCTGGGTTCCAAGCTTTTTGGAAAT               |
|                     | R2 | CGATTTCCAAAAAGCTTGAACCCAGAGGCCCCGGCCCTGAACCAAGACCCCGGAGATCCCAGCTCGA                 |
| <i>hsa-mir-141</i>  | F1 | CGCGTCGGCCGGCCCTGGGTCCATCTTCCAGTACAGTGTGGATGGTCTAAT                                 |
|                     | R1 | GCTTCACAATTAGACCATCCAACACTGTACTGGAAGATGGACCCAGGGCCGGCCGA                            |
|                     | F2 | TGTGAAGCTCCTAACACTGTCTGGTAAAGATGGCTCCCGGGTGGGTTCTTTTTGGAAAT                         |
|                     | R2 | CGATTTCCAAAAAGAACCCACCCGGGAGCCATCTTACCAGACAGTGTAGGA                                 |
| <i>hsa-mir-6806</i> | F1 | CGCGTTGCTCTGTAGGCATGAGGCAGGGCCCAGGTTCCAT                                            |
|                     | R1 | ATCACATGGAACCTGGGCCCTGCCTCATGCCTACAGAGCAA                                           |
|                     | F2 | GTGATGCTGAAGCTCTGACATTCCTGCAGTTTTTTGGAAAT                                           |
|                     | R2 | CGATTTCCAAAACTGCAGGAATGTCAGAGCTTCAGC                                                |
| <i>hsa-mir-1287</i> | F1 | CGCGTGTGTGCTGTCCAGGTGCTGGATCAGTGGTTCGAGTCTGAGCCT                                    |
|                     | R1 | GGCTTTTAAAGGCTCAGACTCGAACCCTGATCCAGCACCTGGACAGCACAACA                               |
|                     | F2 | TTAAAAGCCACTCTAGCCACAGATGCAGTGATTGGAGCCATGACAATTTTTGGAAAT                           |
|                     | R2 | CGATTTCCAAAAATTGTCATGGCTCCAATCACTGCATCTGTGGCTAGAGT                                  |
| <i>hsa-mir-1468</i> | F1 | CGCGTGGTGGGTGGTTTCTCCGTTTGCCTGTTTCGCTGATGTGCATTC                                    |
|                     | R1 | AGTTGAATGCACATCAGCGAAACAGGCAAACGGAGAAACCCACCA                                       |
|                     | F2 | AACTCATTCTCAGCAAATAAGCAAATGGAAATTCGTCCATCTTTTTGGAAAT                                |
|                     | R2 | CGATTTCCAAAAAGATGGACGAATTTTCCATTTGCTATTTTGTGAGAATG                                  |

**Supplementary Table 4.** Selected miRNA based on expression-related criteria

| <b>Expression-related criteria for microRNA selection</b> |                                                                                                                                                                                                  |          |
|-----------------------------------------------------------|--------------------------------------------------------------------------------------------------------------------------------------------------------------------------------------------------|----------|
| 1                                                         | Predicted miRNA interaction with hOCT1 by at least two of the following on-line tools: miRBase, data integrated portal, DIP analysis, EMBL.EBI, miRDB, miRTar, and microrna.                     |          |
| 2                                                         | Clearly expressed in HCC as described in TCGA with a value of >10 RPMMM (reads per million of miRNA mapped)                                                                                      |          |
| 3                                                         | Relationship between miRNA levels and the expression of hOCT1 in HCC according to TCGA:<br>i) inverse correlations were preferred<br>ii) positive correlations with $r \geq 0.11$ were discarded |          |
| <b>Selected microRNA</b>                                  |                                                                                                                                                                                                  |          |
| <b>microRNA</b>                                           | <b>Correlation with <i>hOCT1</i> mRNA</b>                                                                                                                                                        | <b>r</b> |
| hsa-miR-330-3p                                            | inverse                                                                                                                                                                                          | -0.4050  |
| has-miR-1269a                                             | inverse                                                                                                                                                                                          | -0.3500  |
| hsa-miR-769-3p                                            | inverse                                                                                                                                                                                          | -0.2943  |
| hsa-miR-541-3p                                            | inverse                                                                                                                                                                                          | -0.2774  |
| hsa-miR-141-5p                                            | inverse                                                                                                                                                                                          | -0.1718  |
| hsa-miR-598                                               | inverse                                                                                                                                                                                          | -0.0946  |
| hsa-miR-1468-3p                                           | inverse                                                                                                                                                                                          | -0.0897  |
| hsa-miR-1-2                                               | inverse                                                                                                                                                                                          | -0.0801  |
| hsa-miR-324-5p                                            | inverse                                                                                                                                                                                          | -0.0618  |
| hsa-let.7d                                                | inverse                                                                                                                                                                                          | -0.0082  |
| hsa-miR-1287-3p                                           | direct                                                                                                                                                                                           | 0.1003   |

**Supplementary Table 5.** Selected miRNA based on structure-related criteria

| <b>miRNA selection based on structure-related criteria</b> |          |          |          |          |              |
|------------------------------------------------------------|----------|----------|----------|----------|--------------|
| <b>Criteria</b>                                            | <b>a</b> | <b>b</b> | <b>c</b> | <b>d</b> | <b>Score</b> |
| hsa-miR-1468-3p                                            | 3        | 3        | 1        | 3        | 10           |
| hsa-miR-330-3p                                             | 2        | 3        | 2        | 2        | 9            |
| hsa-miR-6806-5p                                            | 2        | 3        | 2        | 2        | 9            |
| hsa-miR-1287-3p                                            | 2        | 3        | 1        | 3        | 9            |
| hsa-miR-141-5p                                             | 2        | 3        | 1        | 2        | 8            |
| hsa-miR-769-3p                                             | 2        | 3        | 1        | 2        | 8            |

Micro-RNA from Supplementary Table 3 with the highest score calculated based on structure-related criteria were selected. Based on published evidence on the potential interest of hsa-mir6806-5p, this was also included in the analysis. The weight of each criteria was established between 1 and 3. Definition of structure-related criteria was as follows:

- a) Proportional to the number of matching nucleotides
- b) Involvement in the binding of microRNA “seed structure”
- c) Presence of complementary binding nucleotides near the microRNA binding site
- d) Presence of AU nucleotides near the complementary binding site

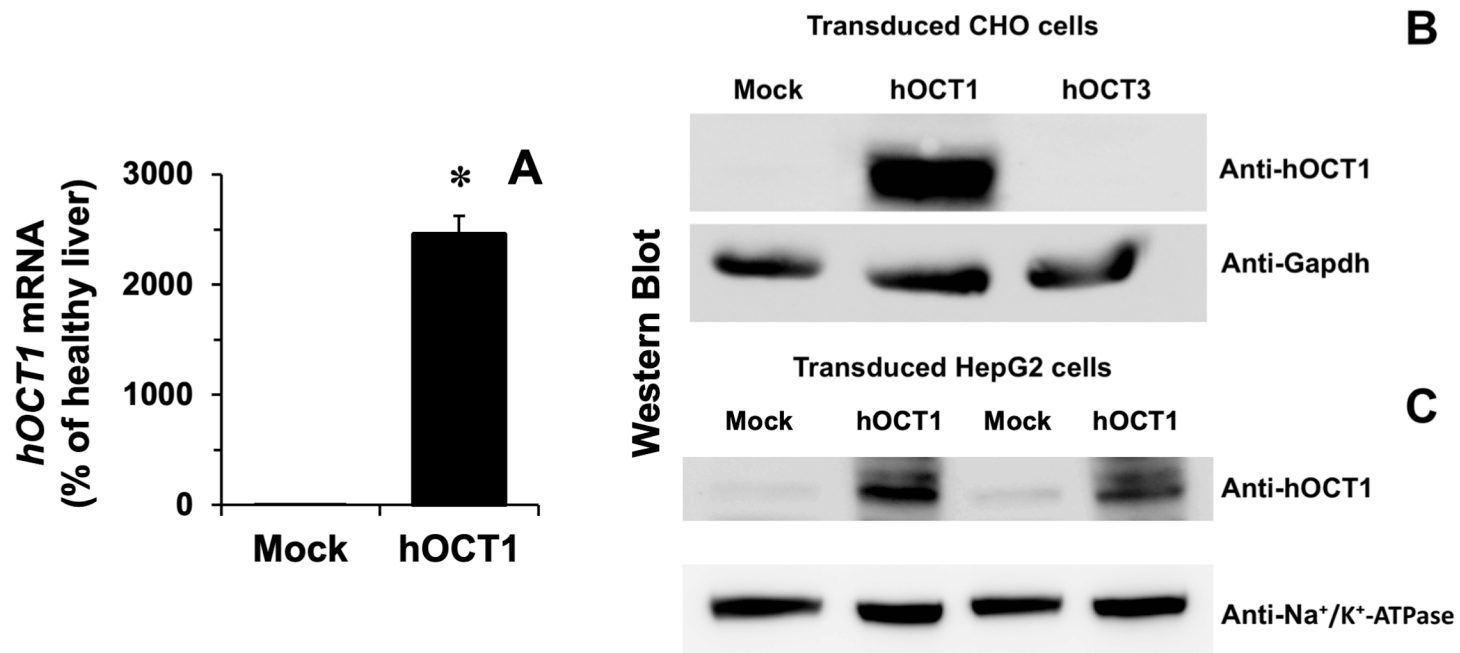

**Supplementary Figure 1.** (A) Relative *hOCT1* mRNA levels in HepG2 cells transduced with lentiviral vectors either empty (Mock) or containing the *hOCT1* coding sequence. Results are mean±SEM (n=5). \*, P<0.05 on comparing both groups by Student *t*-test. (B) Specificity test of the primary antibody used in immunoblotting against *hOCT1*. CHO cells were transduced with empty vectors (Mock) or vectors containing *hOCT1* or *hOCT3* coding sequence. Immunoblot was carried out with cell lysates. Gapdh was used for normalization. (C) Immunoblots (n=5) were then performed in crude preparations of cell membranes obtained from HepG2 cells (Mock and *hOCT1*). Na<sup>+</sup>/K<sup>+</sup>-ATPase was used as normalizer.

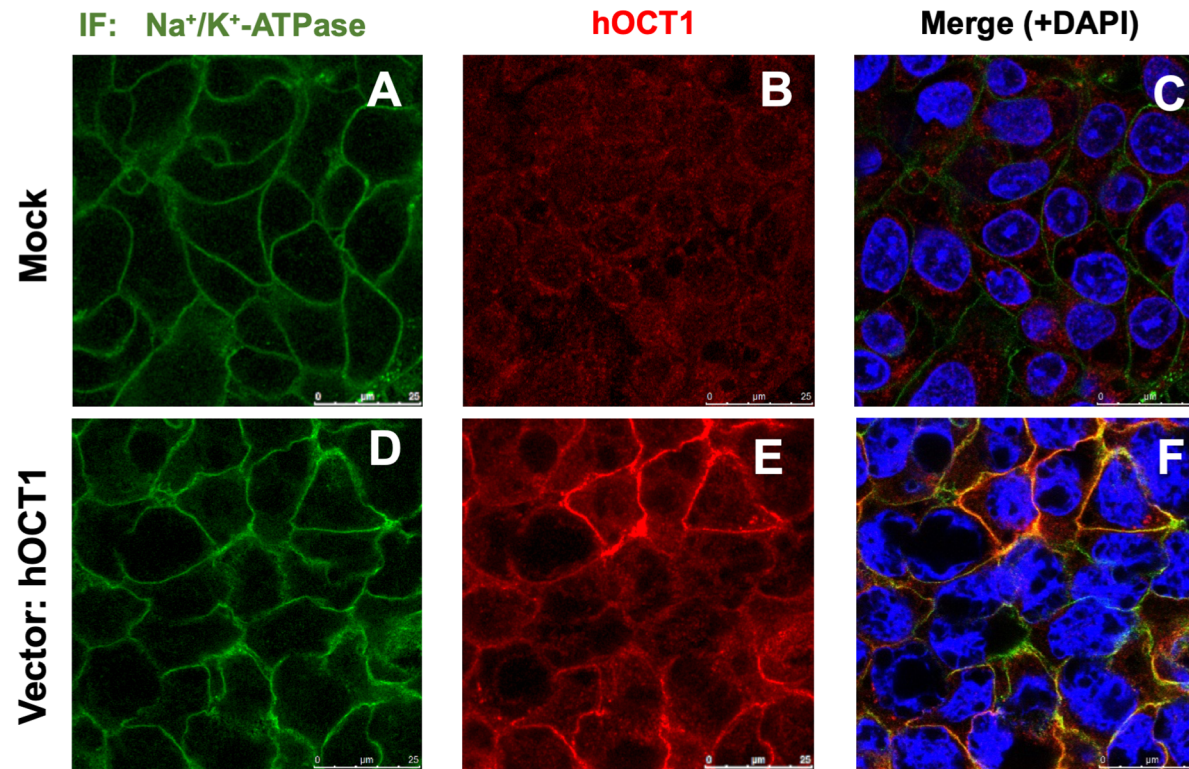

**Supplementary Figure 2.** Immunofluorescence detected by confocal microscopy in HepG2 cells transduced with Mock vectors (A-C) or hOCT1 (D-F) stained with anti-hOCT1 (red) and anti-Na<sup>+</sup>/K<sup>+</sup>-ATPase (green) antibodies. Merge images (C and F) show the nuclei stained with DAPI.

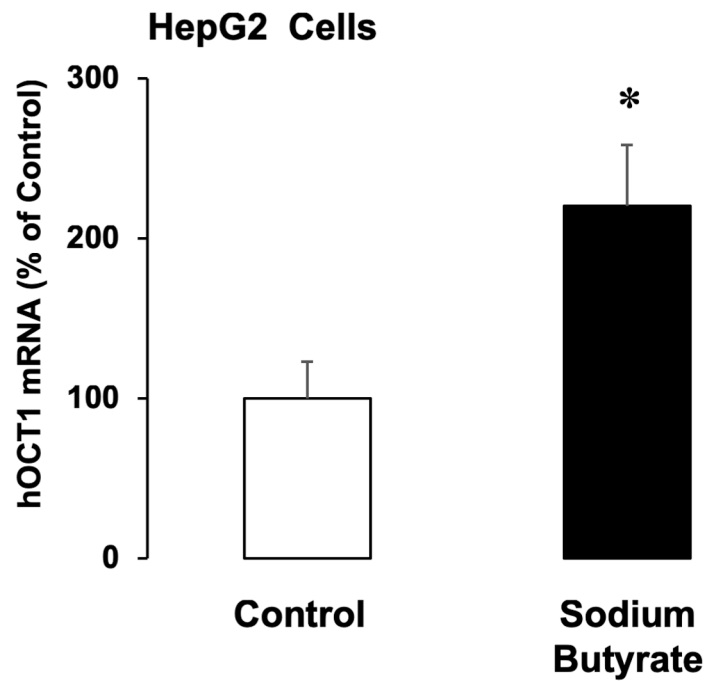

**Supplementary Figure 3.** Relative expression (mRNA levels) of hOCT1 in HepG2 cells after incubation without or with 5 mM sodium butyrate for 24 h. Results are mean $\pm$ SEM (n=5). \*, P<0.05 on comparing both groups by paired *t*-test.



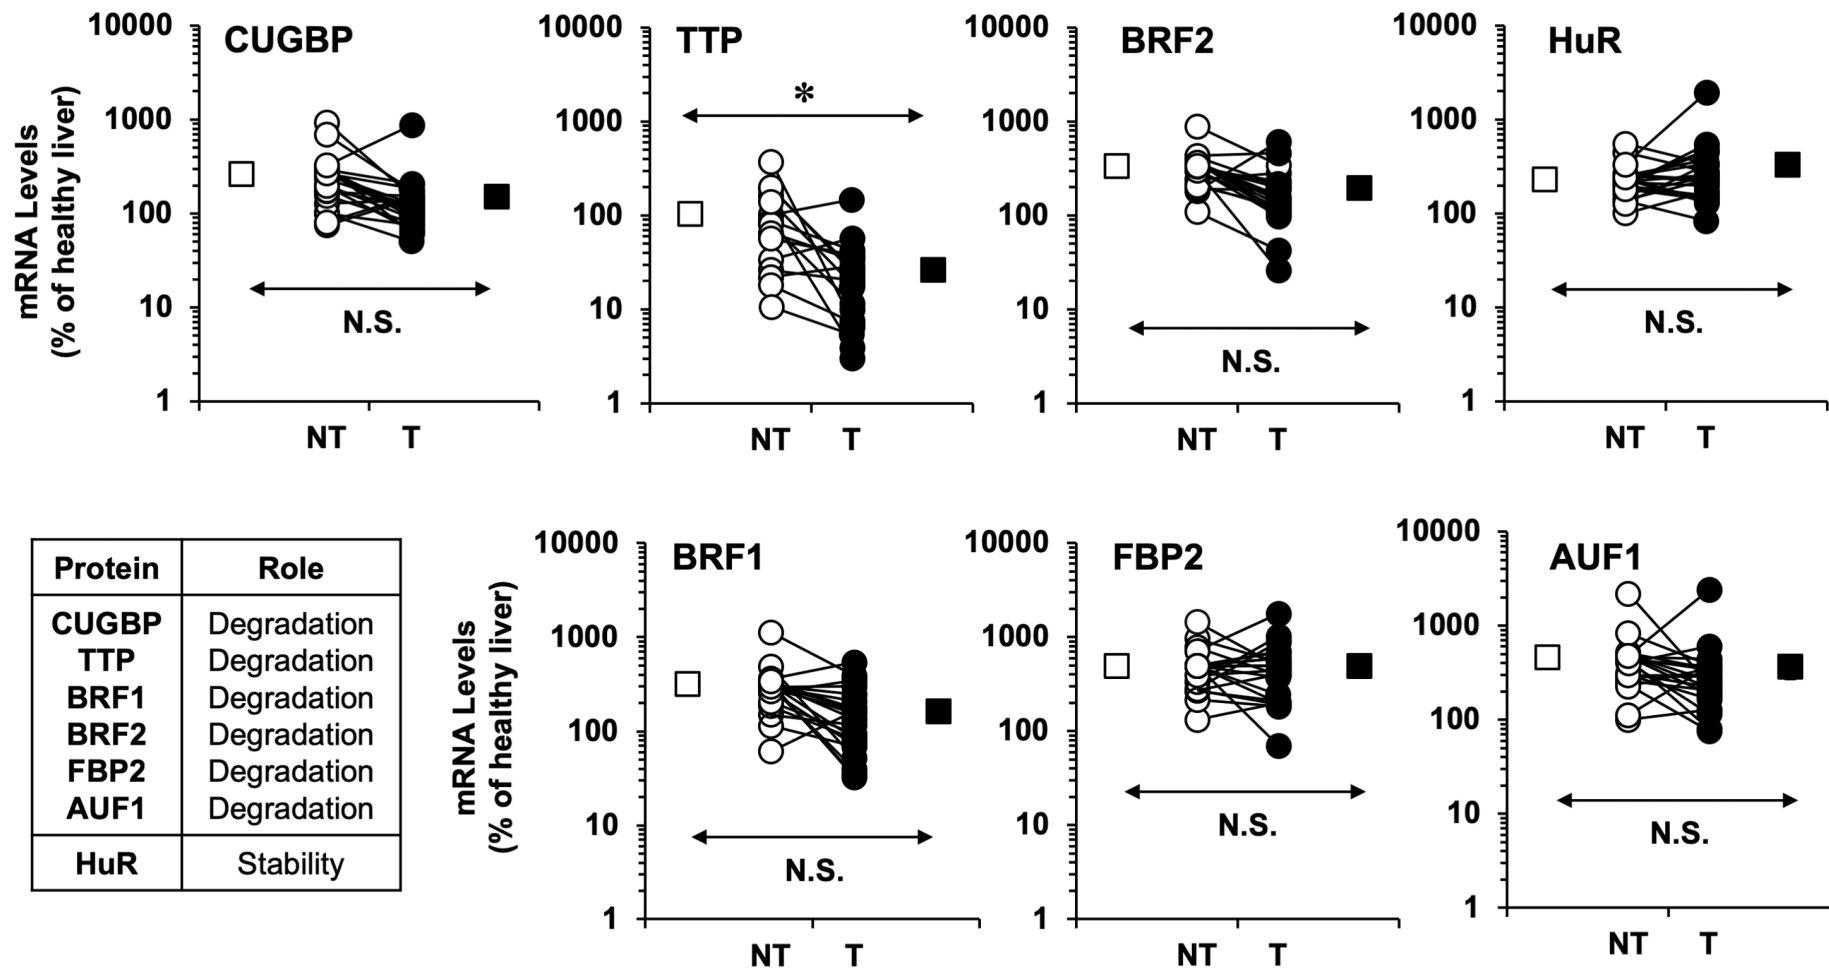

**Supplementary Figure 4.** Relative expression (mRNA levels) in biopsies (n=13) of hepatocellular carcinoma (HCC) of genes involved in favouring mRNA degradation or stability (see table in the inset) as determined by RT-qPCR in the tumour (T) and paired adjacent non-tumour (NT) tissue. Results are shown as individual values (circles) and mean±SEM (squares). \*, P<0.05 comparing T with NT; N.S., not significant difference.
